# Supplementary material for: The SKN‐1/Nrf2 transcription factor can protect against oxidative stress and increase lifespan in C. elegans by distinct mechanisms
Source: PubMed Central journal article supplement (PMC5595692; doi:10.1111/acel.12627), 2017-06-14

Figure S1

A Resistance to heat in liquid

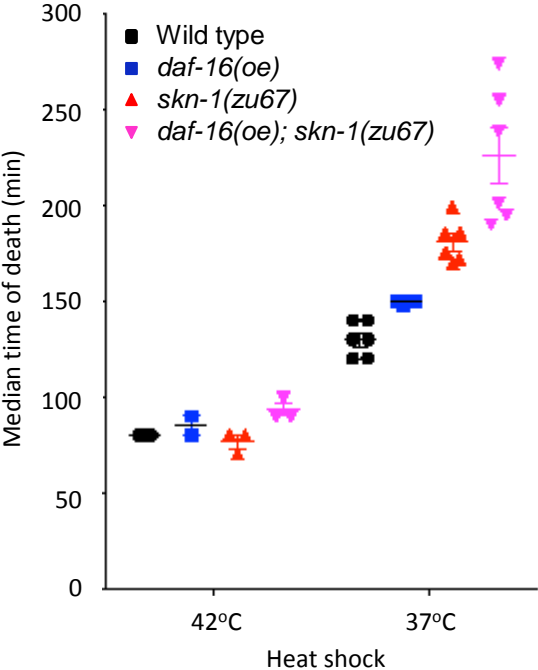

Figure S2

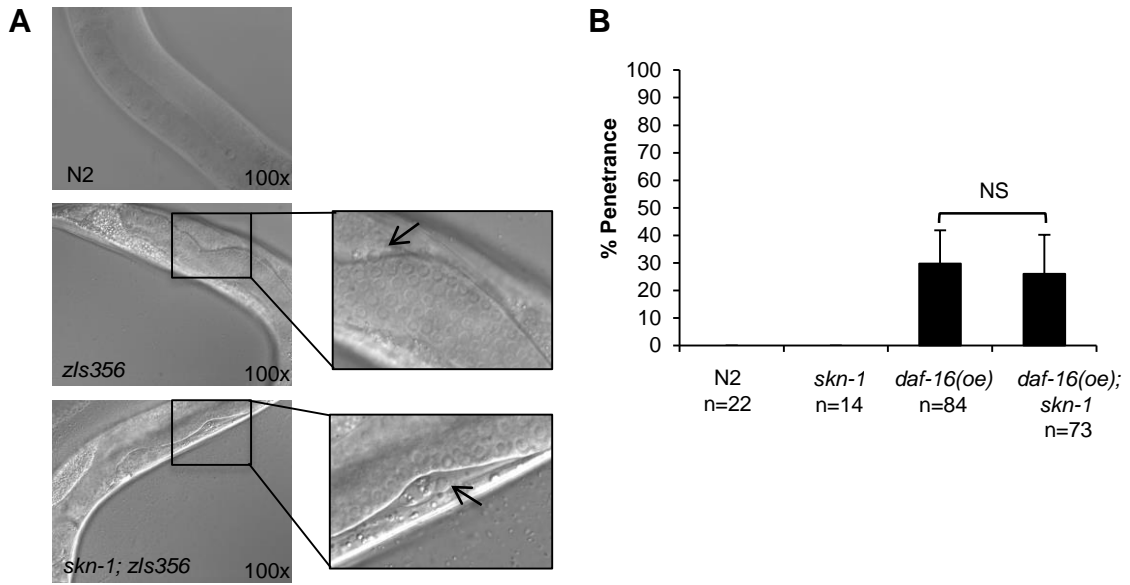

**Figure S3**

**A**

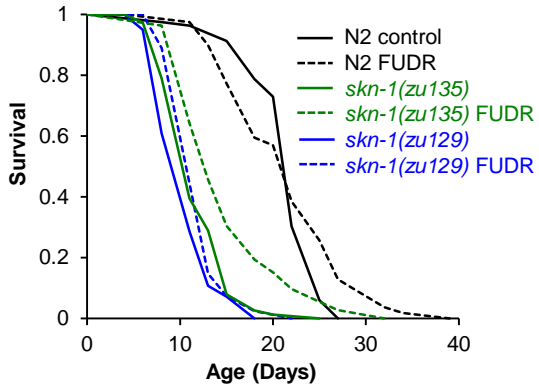

**B**

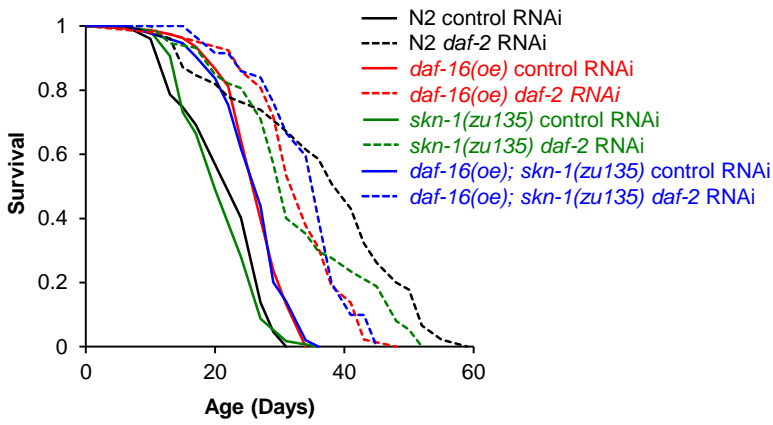

**C**

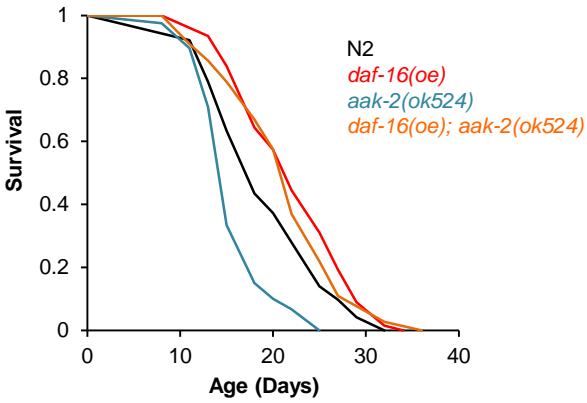

Figure S4

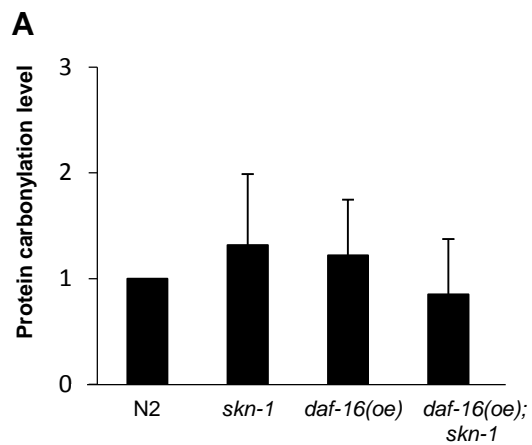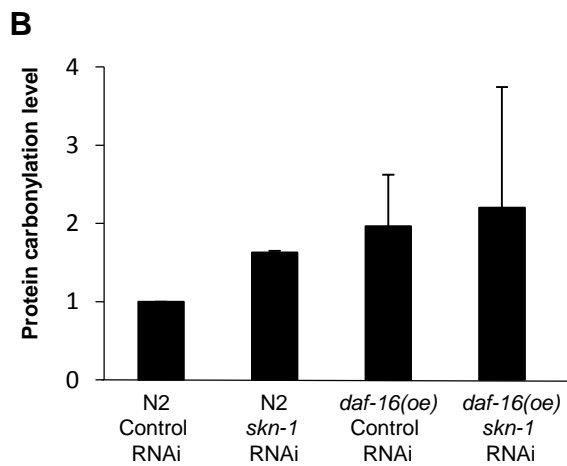

**Figure S5**

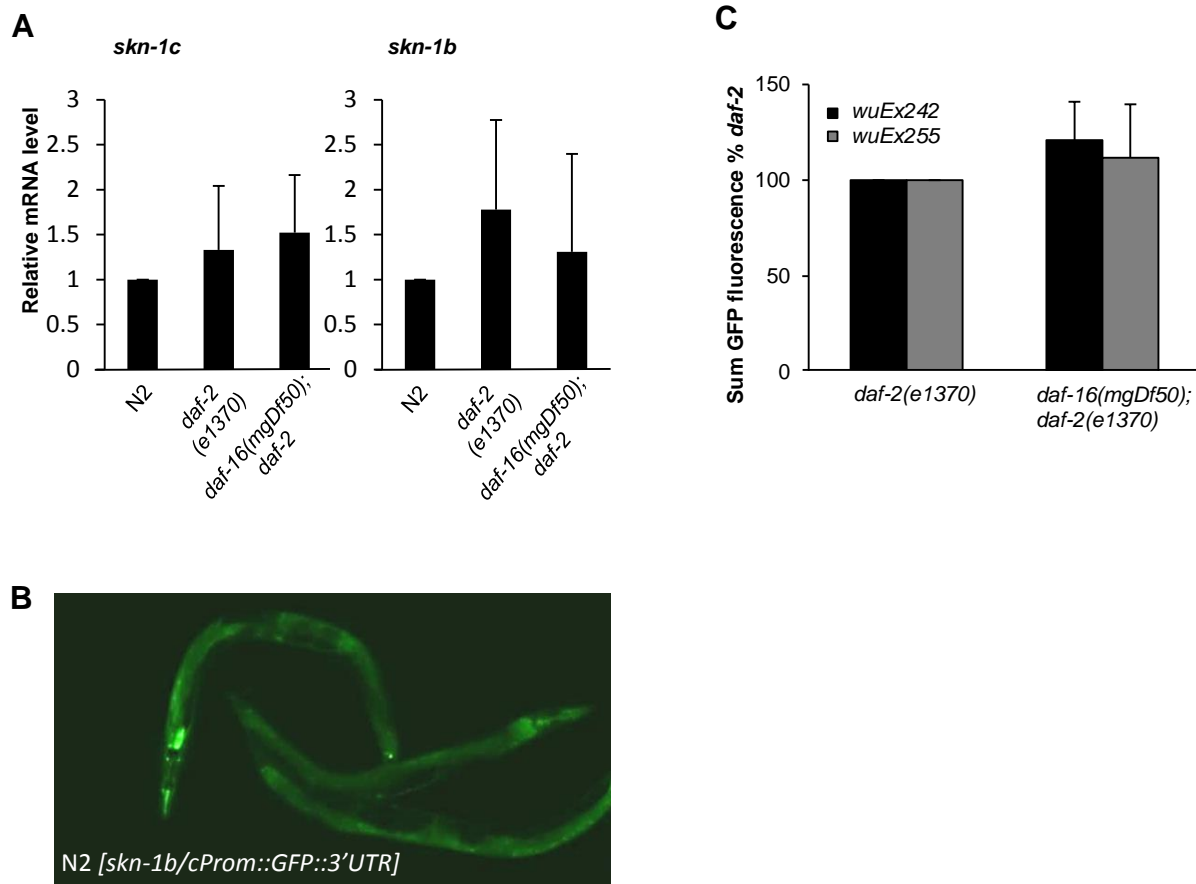

Supplement: ACEL-16-1191-s001.pdf [file ACEL-16-1191-s001.pdf]
